# Supplementary material for: Increased Risk of Thrombocytopenia and Death in Patients with Bacteremia Caused by High Alpha Toxin-Producing Methicillin-Resistant Staphylococcus aureus
Source: MDPI journal article supplement (doi:10.3390/toxins13100726), 2021-10-14
Supplement: s1 [file s1]

# Supplementary Materials: Increased Risk of Thrombocytopenia and Death in Patients with Bacteremia Caused by High Alpha Toxin-Producing Methicillin-Resistant *Staphylococcus aureus*

Fatimah Alhurayri, Edith Porter, Rachid Douglas-Louis, Emi Minejima, Juliane Bubeck Wardenburg and Annie Wong-Beringer

**Table S1.** Characteristics of patients and bacteria isolates.

| Isolate ID | Strain Type | Hla Hemolytic Activity (HU/ml) | Hla Protein level (ng/ 10 µl) | Source of Infection <sup>a</sup> | Intensive Care Unit stay | Day-1 platelets count (10 <sup>9</sup> /L) | 30-day outcome |
|------------|-------------|--------------------------------|-------------------------------|----------------------------------|--------------------------|--------------------------------------------|----------------|
| HH019      | MSSA        | 33.48                          | —                             | Low                              | No                       | 248                                        | Survived       |
| HH020      | MRSA        | 40.2                           | 114.67                        | Intermediate                     | Yes                      | N/A                                        | Death          |
| HH031      | MRSA        | 21.53                          | 102.09                        | High                             | Yes                      | 219                                        | Death          |
| HH032      | MSSA        | 18.785                         | —                             | High                             | No                       | 345                                        | Survived       |
| HH035      | MRSA        | 81.52                          | 241.96                        | Low                              | Yes                      | 176                                        | Death          |
| HH036      | MRSA        | 10.41                          | 16.59                         | Low                              | No                       | 226                                        | Survived       |
| HH037      | MRSA        | 0                              | 0                             | High                             | No                       | 281                                        | Survived       |
| HH043      | MSSA        | 41.92                          | 195.75                        | Intermediate                     | No                       | 85                                         | Death          |
| HH047      | MSSA        | 10.72                          | —                             | Low                              | No                       | 204                                        | Survived       |
| HH060      | MSSA        | 15.06                          | 111.62                        | Intermediate                     | Yes                      | 543                                        | Death          |
| HH070      | MSSA        | 32.74                          | 105.84                        | High                             | Yes                      | 315                                        | Death          |
| HH092      | MSSA        | 4.72                           | 0                             | Intermediate                     | No                       | 227                                        | Survived       |
| HH111      | MSSA        | 68.77                          | —                             | Low                              | No                       | 432                                        | Survived       |
| HH131      | MRSA        | 11.8                           | 21.32                         | Low                              | No                       | 204                                        | Survived       |
| HH140      | MSSA        | 11.77                          | 23.52                         | Intermediate                     | Yes                      | 292                                        | Death          |
| HH144      | MSSA        | 5.45                           | —                             | Low                              | No                       | 197                                        | Survived       |
| HH145      | MRSA        | 58.56                          | 235.5                         | High                             | No                       | 11                                         | Death          |
| HH150      | MRSA        | 0                              | 0                             | Low                              | No                       | 242                                        | Survived       |
| HH151      | MSSA        | 44.44                          | —                             | High                             | No                       | 298                                        | Survived       |
| HH154      | MSSA        | 87.92                          | —                             | High                             | No                       | 254                                        | Survived       |
| HH155      | MSSA        | 0                              | —                             | Low                              | No                       | 211                                        | Survived       |
| HH166      | MRSA        | 24.92                          | 112.1                         | Low                              | Yes                      | 111                                        | Death          |
| HH169      | MSSA        | 38.72                          | —                             | High                             | No                       | 168                                        | Survived       |
| HH171      | MRSA        | 21.84                          | 174.64                        | Low                              | No                       | 224                                        | Survived       |
| HH178      | MRSA        | 67.81                          | 210.38                        | High                             | Yes                      | 117                                        | Death          |
| HH224      | MSSA        | 0                              | —                             | Intermediate                     | No                       | 304                                        | Survived       |
| HH227      | MSSA        | 17.17                          | —                             | Intermediate                     | No                       | 434                                        | Survived       |
| HH243      | MSSA        | 25.66                          | —                             | Intermediate                     | No                       | 204                                        | Survived       |
| HH353      | MSSA        | 0                              | —                             | Intermediate                     | No                       | 252                                        | Death          |

|         |      |        |        |              |     |     |          |
|---------|------|--------|--------|--------------|-----|-----|----------|
| HH361   | MSSA | 36.72  | 213.37 | Low          | No  | 100 | Death    |
| HH363   | MSSA | 47.235 | —      | High         | No  | 398 | Survived |
| HH378   | MSSA | 65.45  | —      | Intermediate | No  | 241 | Survived |
| HH409   | MSSA | 56.94  | —      | Low          | No  | 183 | Survived |
| HH419   | MSSA | 13.35  | 108.72 | Intermediate | Yes | 271 | Death    |
| LAC082  | MRSA | 40.33  | 103.61 | Intermediate | No  | N/A | Survived |
| LAC132  | MSSA | 0      | —      | High         | Yes | N/A | Death    |
| LAC164  | MSSA | 5.13   | 4.12   | Intermediate | Yes | N/A | Survived |
| LAC188  | MRSA | 6.25   | 23.33  | Intermediate | Yes | N/A | Death    |
| LAC475  | MRSA | 17.65  | 118.66 | Intermediate | Yes | 208 | Death    |
| LAC502  | MRSA | 10.5   | 20.04  | Intermediate | No  | 229 | Death    |
| LAC510  | MSSA | 4.75   | 11.75  | Intermediate | Yes | 412 | Death    |
| LAC536  | MRSA | 27.78  | 162.91 | High         | Yes | 13  | Death    |
| LAC545  | MSSA | 6.78   | 37.93  | Low          | Yes | 338 | Death    |
| LAC550  | MSSA | 49.32  | 213.92 | High         | Yes | 106 | Death    |
| LAC587  | MRSA | 34.74  | 203.82 | Low          | Yes | 96  | Death    |
| LAC607  | MRSA | 24.63  | 104.1  | High         | Yes | 94  | Death    |
| LAC633  | MRSA | 6.7    | 49.64  | Low          | Yes | 61  | Death    |
| LAC663  | MSSA | 5.07   | —      | Intermediate | Yes | 18  | Death    |
| LAC684  | MSSA | 13.4   | —      | Low          | Yes | 224 | Death    |
| LAC698  | MSSA | 7.65   | —      | High         | Yes | 50  | Death    |
| LAC699  | MRSA | 30.96  | 177.72 | Low          | Yes | 179 | Death    |
| LAC727  | MRSA | 16.33  | 81.34  | High         | Yes | 270 | Death    |
| LAC786  | MSSA | 0      | 0      | Low          | Yes | 82  | Death    |
| LAC787  | MSSA | 76.43  | 242.65 | Low          | Yes | 142 | Death    |
| LAC843  | MSSA | 61.125 | —      | High         | Yes | 128 | Death    |
| LAC865  | MRSA | 92.09  | 214.75 | High         | Yes | 39  | Death    |
| LAC919  | MRSA | 0      | 0      | High         | Yes | 116 | Death    |
| LAC968  | MSSA | 14.46  | 10.4   | High         | Yes | 431 | Survived |
| LAC985  | MRSA | 25.32  | 187.64 | Low          | No  | 154 | Survived |
| LAC986  | MRSA | 14.865 | 126.7  | High         | No  | 69  | Survived |
| LAC 947 | MSSA | 138.7  | —      | Low          | No  | 236 | Survived |
| LAC1010 | MRSA | 8      | 10.7   | Low          | No  | 218 | Survived |
| LAC1015 | MSSA | 3.4    | —      | Low          | Yes | 323 | Survived |
| LAC1017 | MSSA | 5.34   | —      | Low          | No  | 176 | Survived |
| LAC1018 | MRSA | 56.39  | 220.59 | Low          | No  | 210 | Survived |
| LAC1022 | MRSA | 3.66   | 4.47   | Low          | Yes | 39  | Survived |
| LAC1030 | MSSA | 31.9   | 129.45 | High         | No  | 566 | Survived |
| LAC1056 | MSSA | 0.59   | 0      | Low          | No  | 313 | Survived |
| LAC1057 | MSSA | 22.76  | 147.02 | Intermediate | Yes | 499 | Survived |
| LAC1060 | MRSA | 131.25 | 230.05 | High         | No  | 134 | Death    |
| LAC1063 | MRSA | 16.75  | 66.99  | Intermediate | No  | 198 | Survived |
| LAC1064 | MSSA | 5.25   | 17.44  | Low          | No  | 169 | Survived |
| LAC1067 | MSSA | 1.47   | —      | High         | Yes | 122 | Death    |
| LAC1070 | MSSA | 18.98  | —      | Intermediate | Yes | 136 | Death    |
| LAC1072 | MSSA | 20.23  | —      | Intermediate | No  | 97  | Survived |

|         |      |        |        |              |     |     |          |
|---------|------|--------|--------|--------------|-----|-----|----------|
| LAC1079 | MSSA | 13.79  | —      | Intermediate | Yes | 144 | Survived |
| LAC1082 | MSSA | 29.03  | 72.43  | High         | No  | 130 | Survived |
| LAC1084 | MRSA | 51.4   | 208.29 | Intermediate | No  | 111 | Survived |
| LAC1086 | MSSA | 34.49  | —      | Intermediate | No  | 378 | Survived |
| LAC1088 | MSSA | 29.2   | —      | Intermediate | Yes | 169 | Survived |
| LAC1090 | MRSA | 53.55  | 219.42 | Intermediate | Yes | 93  | Death    |
| LAC1094 | MSSA | 21.59  | 97.42  | Low          | No  | 351 | Survived |
| LAC1105 | MRSA | 29.53  | 87.65  | High         | No  | 316 | Survived |
| LAC1110 | MSSA | 9.64   | 54.01  | Intermediate | No  | 153 | Survived |
| LAC1115 | MRSA | 3.76   | 0      | Low          | No  | 352 | Survived |
| LAC1117 | MSSA | 10.25  | —      | Low          | No  | 175 | Survived |
| LAC1118 | MRSA | 13.9   | 74.02  | Low          | Yes | 159 | Death    |
| LAC1120 | MSSA | 13.7   | —      | Intermediate | No  | 177 | Survived |
| LAC1122 | MSSA | 12.99  | —      | Intermediate | Yes | 266 | Death    |
| LAC1138 | MSSA | 18.99  | —      | Intermediate | No  | 147 | Survived |
| LAC1139 | MSSA | 0      | —      | High         | Yes | 103 | Death    |
| LAC1140 | MSSA | 7.55   | —      | High         | Yes | 49  | Death    |
| LAC1152 | MSSA | 9.69   | —      | High         | Yes | 366 | Death    |
| LAC1159 | MRSA | 25.92  | 154.54 | High         | Yes | 274 | Death    |
| LAC1177 | MRSA | 65.19  | 216.62 | High         | Yes | 127 | Death    |
| LAC1199 | MRSA | 98.77  | 220.51 | Intermediate | Yes | 87  | Death    |
| LAC1238 | MRSA | 75.4   | 243.39 | High         | Yes | 58  | Death    |
| LAC1251 | MSSA | 82.63  | —      | Intermediate | Yes | 227 | Death    |
| LAC1258 | MRSA | 61.38  | 222.17 | Intermediate | Yes | 48  | Death    |
| LAC1263 | MSSA | 103.18 | —      | High         | No  | 192 | Death    |

NOTE: <sup>a</sup> Mortality risk based on source of infection per Soriano et al.<sup>21</sup>: high risk source of infection include endovascular sources, lower respiratory tract, IA, and CNS foci, intermediate risk source of infection include osteoarticular sources, soft tissue sources, and unknown sources, low source of infection include IV catheter, UTI, ear-nose-larynx, gynecologic sources, and several manipulation-related sources including digestive endoscopy, arterial catheterization, and sclerosis of esophageal varices. Hla hemolytic activity (HU/ml) was assessed by hemolysis assay on rabbit erythrocytes (hemolytic activity shown is the average of 2 independent experiments performed in duplicates). Hla protein level (ng/ 10 µl) was quantified by Western immunoblot assay.

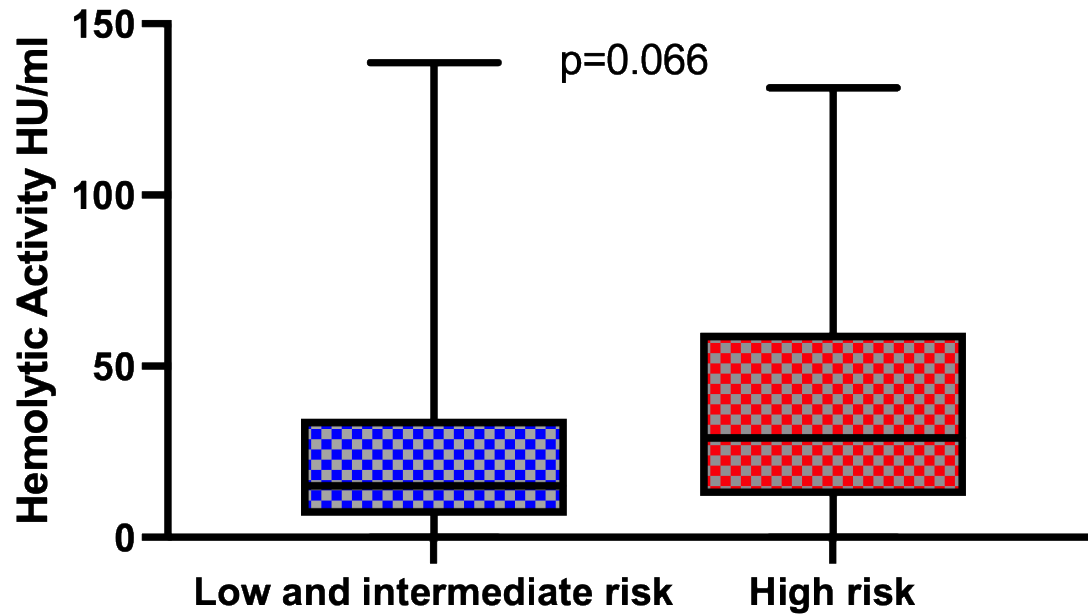

**Figure S1.** Alpha hemolysin hemolytic activity analysis based on the source of bacteremia

*S. aureus* isolates obtained from patients were grouped based on the source risk of infection.<sup>21</sup> High risk source of infection include endovascular sources, lower respiratory tract, IA, and CNS foci, intermediate risk source of infection include osteoarticular sources, soft tissue sources, and unknown sources, low source of infection include IV catheter, UTI, ear-nose-larynx, gynecologic sources, and several manipulation-related sources including digestive endoscopy, arterial catheterization, and sclerosis of esophageal varices. Higher hemolytic activity for isolates from high risk vs. intermediate-risk and low-risk sources of bacteremia: [median 29.04 HU (IQR 12.08, 59.84) vs 15.06 HU (IQR 6.25, 34.74),  $p=0.066$ ]. Box plots represent the hemolytic activity (median value and interquartile range) and whiskers represent min and max values for the respective risk groups. p value as determined by Mann-Whitney test.
